# Supplementary material for: High performance optical temperature sensingviaselectively partitioning Cr4+in the residual SiO2-rich phase of glass-ceramics
Source: Royal Society of Chemistry journal article supplement (doi:10.1039/c9cp03929e), 2019-01-01
Supplement: c9cp03929e1.pdf [file c9cp03929e1.pdf]

## Supporting Information

### **High Performance Optical Temperature Sensing via Selectively Partitioning Cr<sup>4+</sup> in the Residual SiO<sub>2</sub>-rich Phase of Glass-ceramics**

Zhanwen Zhang,<sup>a, †</sup> Xinfang Li,<sup>a</sup> Changjiang Wang,<sup>b</sup> Xvsheng Qiao<sup>b</sup>

*a. Civil Aviation Flight University of China Luoyang College, Luoyang 471001, China*

*b. State Key Laboratory of Silicon Materials & School of Materials Science and Engineering,  
Zhejiang University, Hangzhou 310027, China.*

*† Corresponding author. E-mail: ziyu4983@sina.com; Tel.: +86-379-62328265.*

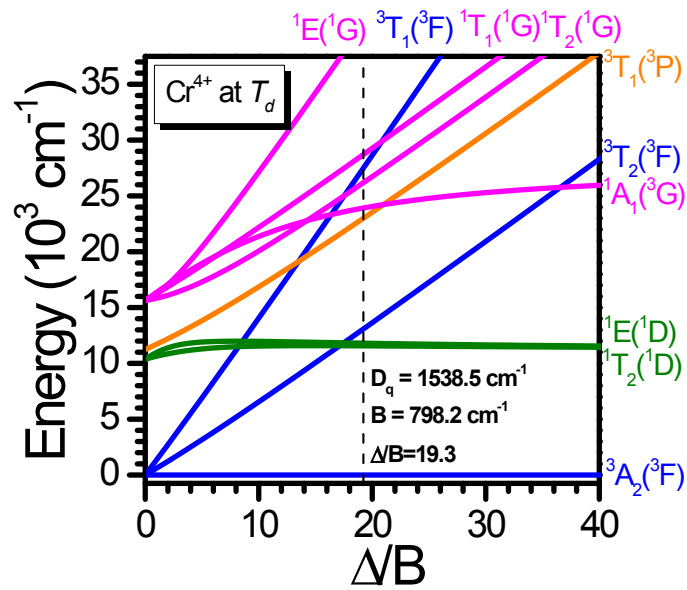

Figure S1 Tanabe-Sugano diagrams of  $\text{Cr}^{4+}$  ions in a tetrahedral crystal field ( $\Delta/B \approx 19.3$ ,  $B=798.2 \text{ cm}^{-1}$ )

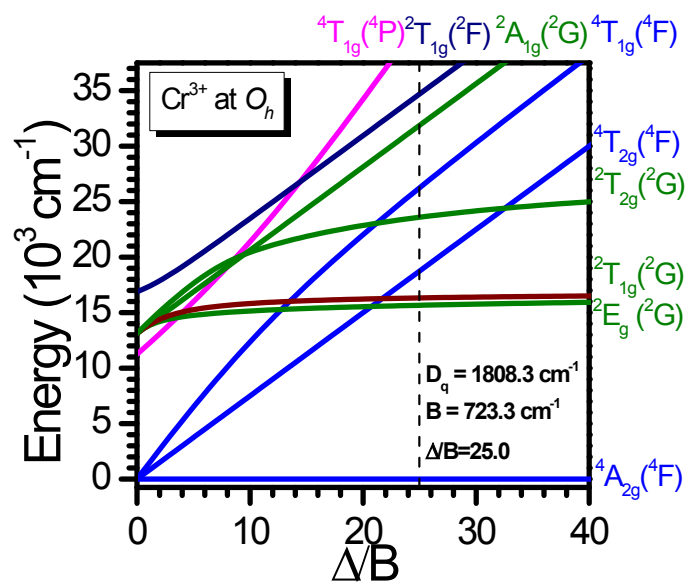

Figure S2 Tanabe-Sugano diagrams of  $\text{Cr}^{3+}$  ions in an octahedral crystal field ( $\Delta/B \approx 25.0$ ,  $B= 723.3 \text{ cm}^{-1}$ ).

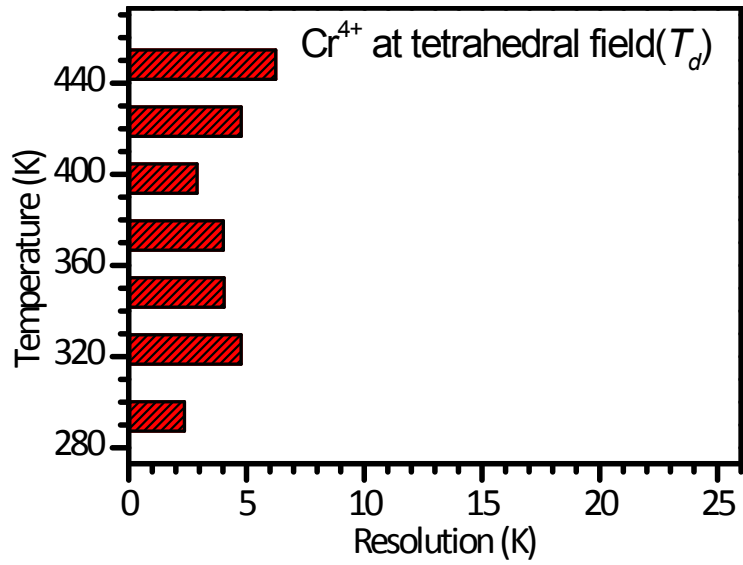

Figure S3 Thermal resolution of Cr<sup>4+</sup> temperature sensing in the investigated glass-ceramics.

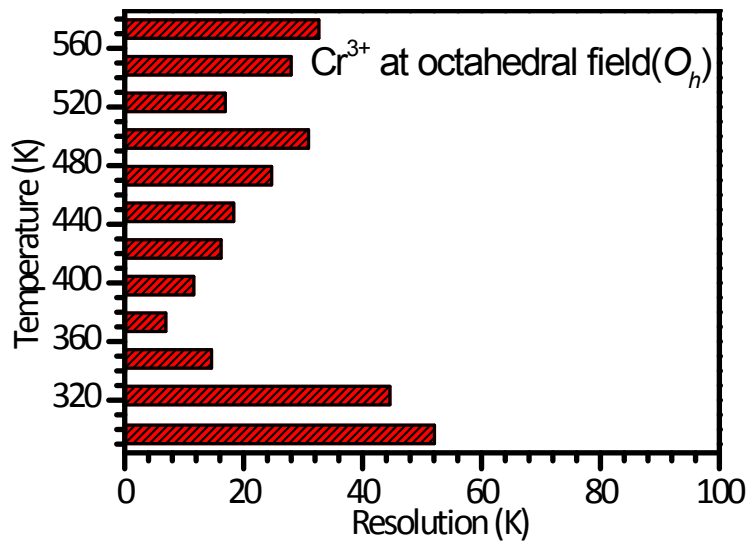

Figure S4 Thermal resolution of Cr<sup>3+</sup> temperature sensing in the investigated glass-ceramics.
